# Supplementary material for: Efficient Extraction and Purification of Isofraxidin from Acanthopanax Senticosus by DES
Source: Preprints.org preprint supplement (doi:10.20944/preprints202302.0339.v1), 2023-02-20
Supplement: Supplementary file 1 [file supplementary]

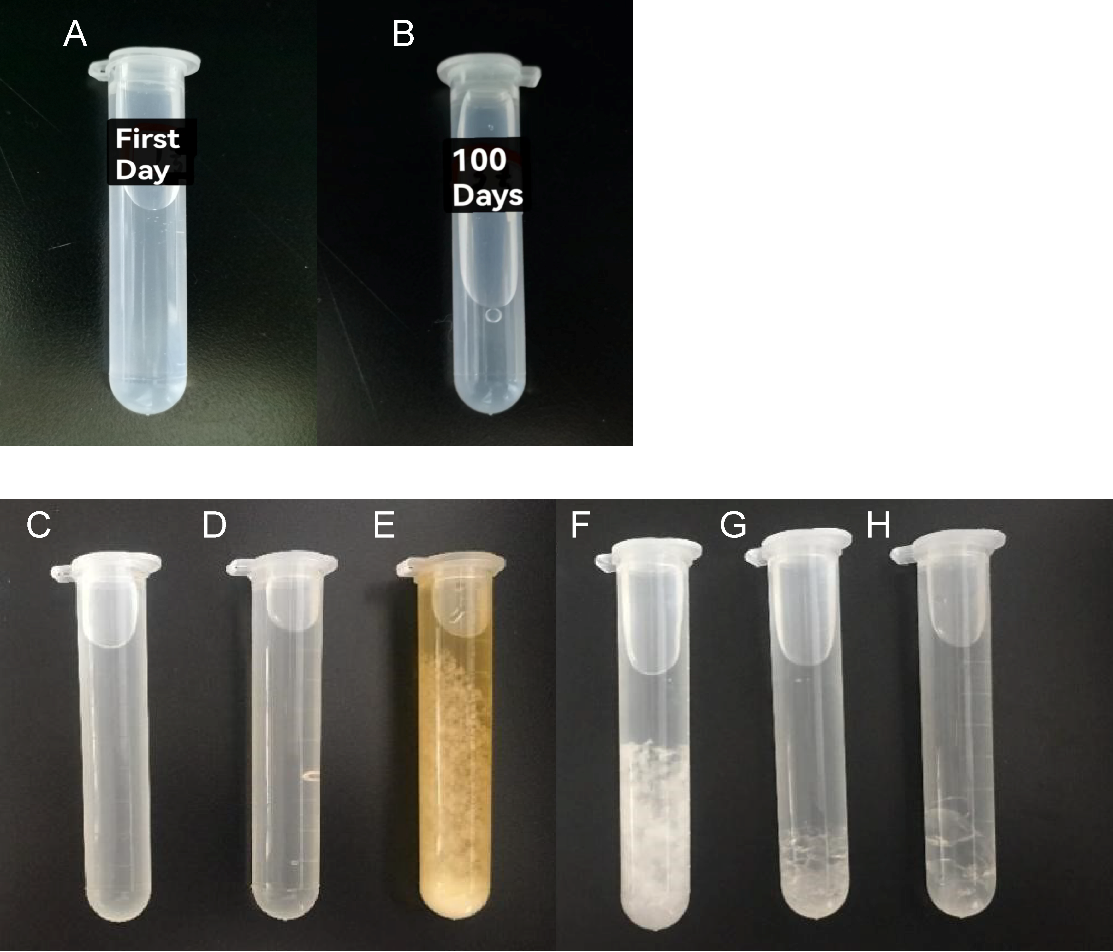


**Extended Data Figure 1.** Static stability of DES (A: DES synthesized by choline chloride and citric acid on the first day, B: DES synthesized by choline chloride and citric acid on day 100, C and D: DES synthesized by choline chloride and citric acid on day 100, E: DES synthesized by choline chloride and L-ascorbic acid on day 100, F: DES synthesized by betaine and proline on day 100, G: DES synthesized by betaine and maleic acid on day 100, H: DES synthesized by betaine and xylitol on day 100).
